# Supplementary material for: Evaluation of In Vitro Cytotoxic Potential of Avarol towards Human Cancer Cell Lines and In Vivo Antitumor Activity in Solid Tumor Models
Source: MDPI journal article supplement (doi:10.3390/molecules27249048), 2022-12-19
Supplement: s1 [file s1]

## Supplementary material S1

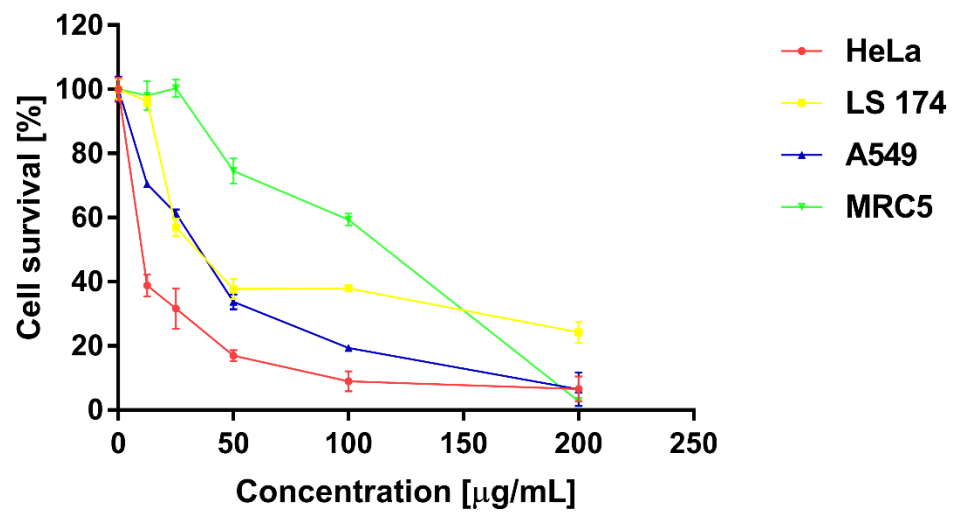

**Figure S1.** Representative graph of HeLa, LS174, A549 and MRC-5 cells survival after 72 hours of cell growth in the presence of increasing concentrations of investigated avarol

## Supplementary material S2

### Protocol for studying the effect of avarol on the growth of solid Ehrlich carcinoma (SEC) in mice

**Biological object:** female mice F1 (CBA×C57BL/6j) at the age of 2-2.5 months, with a body weight of 19-23 g

**Method of neoplasia transplantation:** s.c. injection of  $2.5 \cdot 10^6$  SEC cells in 0.3 mL of medium 199 in the area of the lateral surface of the right thigh

**Animal groups and exposure scheme:** control group (n = 17) – after SEC inoculation, does not receive any effects; experimental group (n = 16) – from the 7th to the 20th day after SEC transplantation, avarol is administered daily (50 mg/kg, i.p.) as a 0.5% suspension in water for injection.

**Table S1.** Individual indicators of the SEC volume at different periods after transplantation in mice of experimental groups

| Mouse No.                | Tumor volume, mm <sup>3</sup> |        |        |        |        |        |
|--------------------------|-------------------------------|--------|--------|--------|--------|--------|
|                          | 7 day                         | 10 day | 13 day | 15 day | 18 day | 20 day |
| Control (untreated) mice |                               |        |        |        |        |        |
| 1                        | 92                            | 310    | 503    | 681    | 996    | 1458   |
| 2                        | 47                            | 190    | 359    | 681    | 1040   | 1256   |
| 3                        | 42                            | 117    | 190    | 359    | 567    | 942    |
| 4                        | 92                            | 206    | 310    | 679    | 1048   | 1331   |
| 5                        | 42                            | 117    | 245    | 442    | 605    | 806    |
| 6                        | 47                            | 127    | 245    | 385    | 569    | 994    |
| 7                        | 58                            | 144    | 245    | 442    | 721    | 850    |
| 8                        | 52                            | 309    | 332    | 850    | 992    | 1256   |
| 9                        | 64                            | 138    | 287    | 536    | 992    | 1269   |
| 10                       | 84                            | 288    | 412    | 568    | 1155   | 1524   |
| 11                       | 75                            | 206    | 310    | 605    | 851    | 1155   |
| 12                       | 64                            | 190    | 288    | 502    | 803    | 1155   |
| 13                       | 101                           | 338    | 482    | 928    | 1031   | 1520   |
| 14                       | 51                            | 106    | 144    | 383    | 529    | 756    |
| 15                       | 64                            | 264    | 359    | 803    | 1099   | 1393   |
| 16                       | 42                            | 84     | 190    | 310    | 643    | 981    |
| 17                       | 92                            | 222    | 385    | 679    | 1100   | 1593   |
| Avarol-treated mice      |                               |        |        |        |        |        |
| 18                       | 84                            | 190    | 288    | 469    | 804    | 995    |
| 19                       | 117                           | 190    | 288    | 570    | 1047   | 1155   |
| 20                       | 58                            | 157    | 245    | 442    | 721    | 897    |
| 21                       | 75                            | 145    | 190    | 359    | 721    | 890    |
| 22                       | 58                            | 89     | 120    | 275    | 687    | 759    |
| 23                       | 84                            | 190    | 245    | 536    | 898    | 945    |
| 24                       | 84                            | 190    | 226    | 412    | 721    | 898    |
| 25                       | 64                            | 84     | 117    | 287    | 643    | 681    |
| 26                       | 92                            | 190    | 359    | 679    | 851    | 898    |
| 27                       | 47                            | 117    | 226    | 412    | 605    | 756    |
| 28                       | 58                            | 144    | 174    | 383    | 529    | 678    |
| 29                       | 84                            | 144    | 245    | 503    | 898    | 1100   |

|    |    |     |     |     |     |      |
|----|----|-----|-----|-----|-----|------|
| 30 | 47 | 93  | 117 | 272 | 558 | 672  |
| 31 | 42 | 84  | 106 | 245 | 503 | 605  |
| 32 | 84 | 174 | 206 | 359 | 605 | 804  |
| 33 | 75 | 206 | 288 | 503 | 756 | 1039 |

**Table S2.** Individual indicators of the SEC relative growth at different periods after transplantation in mice of experimental groups

| Mouse No.                | Relative tumor volume, rel. units * |        |        |        |        |        |
|--------------------------|-------------------------------------|--------|--------|--------|--------|--------|
|                          | 7 day                               | 10 day | 13 day | 15 day | 18 day | 20 day |
| Control (untreated) mice |                                     |        |        |        |        |        |
| 1                        | 1.00                                | 3.36   | 5.45   | 7.39   | 10.80  | 15.81  |
| 2                        | 1.00                                | 4.03   | 7.62   | 14.45  | 22.06  | 26.67  |
| 3                        | 1.00                                | 2.75   | 4.48   | 8.47   | 13.38  | 22.22  |
| 4                        | 1.00                                | 2.23   | 3.36   | 7.36   | 11.36  | 14.44  |
| 5                        | 1.00                                | 2.75   | 5.78   | 10.42  | 14.27  | 19.00  |
| 6                        | 1.00                                | 2.70   | 5.20   | 8.17   | 12.09  | 21.11  |
| 7                        | 1.00                                | 2.49   | 4.24   | 7.65   | 12.49  | 14.73  |
| 8                        | 1.00                                | 5.97   | 6.40   | 16.41  | 19.14  | 24.24  |
| 9                        | 1.00                                | 2.15   | 4.48   | 8.36   | 15.47  | 19.80  |
| 10                       | 1.00                                | 3.43   | 4.92   | 6.77   | 13.78  | 18.18  |
| 11                       | 1.00                                | 2.73   | 4.11   | 8.03   | 11.28  | 15.31  |
| 12                       | 1.00                                | 2.96   | 4.48   | 7.84   | 12.52  | 18.00  |
| 13                       | 1.00                                | 3.36   | 4.79   | 9.23   | 10.26  | 15.13  |
| 14                       | 1.00                                | 2.07   | 2.81   | 7.46   | 10.32  | 14.73  |
| 15                       | 1.00                                | 4.11   | 5.60   | 12.52  | 17.14  | 21.73  |
| 16                       | 1.00                                | 1.98   | 4.48   | 7.30   | 15.16  | 23.14  |
| 17                       | 1.00                                | 2.41   | 4.18   | 7.36   | 11.93  | 17.28  |
| Avarol-treated mice      |                                     |        |        |        |        |        |
| 18                       | 1.00                                | 2.27   | 3.43   | 5.60   | 9.59   | 11.88  |
| 19                       | 1.00                                | 1.63   | 2.47   | 4.88   | 8.98   | 9.90   |
| 20                       | 1.00                                | 2.72   | 4.24   | 7.65   | 12.49  | 15.55  |
| 21                       | 1.00                                | 1.91   | 2.52   | 4.76   | 9.56   | 11.81  |
| 22                       | 1.00                                | 1.55   | 2.08   | 4.76   | 11.91  | 13.16  |
| 23                       | 1.00                                | 2.27   | 2.92   | 6.40   | 10.72  | 11.28  |
| 24                       | 1.00                                | 2.27   | 2.70   | 4.92   | 8.61   | 10.72  |
| 25                       | 1.00                                | 1.31   | 1.82   | 4.48   | 10.03  | 10.62  |
| 26                       | 1.00                                | 2.06   | 3.90   | 7.36   | 9.23   | 9.74   |
| 27                       | 1.00                                | 2.47   | 4.80   | 8.75   | 12.84  | 16.04  |
| 28                       | 1.00                                | 2.49   | 3.02   | 6.63   | 9.17   | 11.76  |
| 29                       | 1.00                                | 1.72   | 2.92   | 6.00   | 10.72  | 13.13  |
| 30                       | 1.00                                | 4.03   | 4.37   | 9.38   | 14.45  | 19.05  |
| 31                       | 1.00                                | 1.98   | 2.50   | 5.78   | 11.85  | 14.27  |
| 32                       | 1.00                                | 2.08   | 2.46   | 4.29   | 7.22   | 9.59   |
| 33                       | 1.00                                | 2.73   | 3.81   | 6.67   | 10.03  | 13.78  |

\* - indicators for each animal (Table 1) are normalized to the initial (on the 7th day) tumor volume before the start of pharmacological interventions;

**Table S3.** SEC growth inhibition rates in avarol-treated mice at different follow-up periods

| Mouse No.           | Tumor inhibition, % |        |        |        |        |        |
|---------------------|---------------------|--------|--------|--------|--------|--------|
|                     | 7 day               | 10 day | 13 day | 15 day | 18 day | 20 day |
| Avarol-treated mice |                     |        |        |        |        |        |
| 18                  | 0.0                 | 25.1   | 29.2   | 38.7   | 30.2   | 37.2   |
| 19                  | 0.0                 | 46.2   | 49.1   | 46.5   | 34.6   | 47.7   |
| 20                  | 0.0                 | 10.2   | 12.4   | 16.2   | 9.1    | 17.8   |
| 21                  | 0.0                 | 37.0   | 48.0   | 47.8   | 30.4   | 37.6   |
| 22                  | 0.0                 | 48.9   | 57.0   | 47.8   | 13.3   | 30.4   |
| 23                  | 0.0                 | 25.1   | 39.7   | 29.9   | 22.0   | 40.4   |
| 24                  | 0.0                 | 25.1   | 44.3   | 46.1   | 37.3   | 43.3   |
| 25                  | 0.0                 | 56.9   | 62.5   | 50.9   | 27.0   | 43.9   |
| 26                  | 0.0                 | 31.9   | 19.6   | 19.3   | 32.8   | 48.5   |
| 27                  | 0.0                 | 18.3   | 1.0    | 4.2    | 6.5    | 15.2   |
| 28                  | 0.0                 | 17.7   | 37.7   | 27.3   | 33.2   | 37.8   |
| 29                  | 0.0                 | 43.3   | 39.7   | 34.3   | 22.0   | 30.6   |
| 30                  | 0.0                 | 0.0    | 9.9    | 0.0    | 0.0    | 0.0    |
| 31                  | 0.0                 | 34.8   | 48.4   | 36.7   | 13.7   | 24.5   |
| 32                  | 0.0                 | 31.3   | 49.3   | 53.0   | 47.4   | 49.3   |
| 33                  | 0.0                 | 9.8    | 21.3   | 27.0   | 27.0   | 27.1   |

**Table S4.** Effect of avarol on SEC growth in mice

| Time after inoculation, day | Relative tumor volume, rel. units; (M ± SD) |                              | Difference level * | Tumor inhibition, %; (M ± SD) |
|-----------------------------|---------------------------------------------|------------------------------|--------------------|-------------------------------|
|                             | Untreated mice (n = 17)                     | Avarol-treated mice (n = 16) |                    |                               |
| 7                           | 1.00                                        | 1.00                         | $p = 1.000000$     | 0.0                           |
| 10                          | 3.03 ± 0.99                                 | 2.22 ± 0.63                  | $p = 0.003498$     | 28.8 ± 15.6                   |
| 13                          | 4.85 ± 1.13                                 | 3.12 ± 0.87                  | $p = 0.000107$     | 35.6 ± 18.0                   |
| 15                          | 9.13 ± 2.77                                 | 6.15 ± 1.53                  | $p = 0.000254$     | 32.9 ± 16.4                   |
| 18                          | 13.73 ± 3.25                                | 10.46 ± 1.85                 | $p = 0.000756$     | 24.1 ± 12.7                   |
| 20                          | 18.91 ± 3.76                                | 12.64 ± 2.62                 | $p = 0.000034$     | 33.2 ± 13.7                   |

\* - calculated using the Mann-Whitney U test;

### Protocol for studying the effect of avarol on the growth of cervical cancer (CC-5) in mice

**Biological object:** female mice CBA at the age of 2 months, with a body weight of 19-22 g.

**Method of neoplasia transplantation:** s.c. injection of a homogenate of 100 mg of tumor tissue in 0.5 mL of medium 199 into the region of the lateral surface of the right thigh

**Groups of animals and treatment scheme:** control group (n = 24) – after CC transplantation, does not receive any effects; the experimental group (n = 24) - from the 7th to the 18th day after CC inoculation, mice are injected daily with avarol (50 mg/kg, i.p.) in the form of a 0.5% suspension in water for injections. On the 14th day, 5 mice are removed from each group for staged morphological studies.

**Table S5.** Individual indicators of CC volume at different periods after transplantation in mice of experimental groups

| Mouse No.                | Tumor volume, mm3 |       |        |        |                    |        |
|--------------------------|-------------------|-------|--------|--------|--------------------|--------|
|                          | 7 day             | 9 day | 11 day | 14 day | 16 day             | 18 day |
| Control (untreated) mice |                   |       |        |        |                    |        |
| 1                        | 308               | 636   | 943    | 1267   | 1454               | 2212   |
| 2                        | 436               | 681   | 890    | 1267   | 1523               | 2035   |
| 3                        | 190               | 536   | 1047   | 1212   | 1885               | 2111   |
| 4                        | 190               | 567   | 605    | 945    | 1270               | 2045   |
| 5                        | 158               | 383   | 536    | 898    | 1270               | 1731   |
| 6                        | 308               | 838   | 1039   | death  |                    |        |
| 7                        | 353               | 866   | 1267   | 1734   | 2212               | 2668   |
| 8                        | 226               | 679   | 763    | 1454   | 1734               | 2035   |
| 9                        | 174               | 353   | 679    | 1204   | 1454               | 2212   |
| 10                       | 158               | 594   | 803    | 995    | 1212               | death  |
| 11                       | 226               | 503   | 679    | 1212   | 1523               | 1882   |
| 12                       | 189               | 492   | 709    | 803    | 1097               | 1454   |
| 13                       | 190               | 605   | 803    | 1331   | 1523               | 1810   |
| 14                       | 158               | 594   | 851    | 1100   | 1523               | 1882   |
| 15                       | 226               | 662   | 943    | 1454   | 1734               | 2386   |
| 16                       | 207               | 567   | 605    | 995    | 1331               | 2290   |
| 17                       | 190               | 636   | 756    | death  |                    |        |
| 18                       | 174               | 359   | 567    | 806    | 1267               | 1583   |
| 19                       | 266               | 567   | 1047   | 1734   | 1885               | death  |
| 20                       | 226               | 756   | 838    | 1212   | Taken for research |        |
| 21                       | 383               | 785   | 981    | 1267   | Taken for research |        |
| 22                       | 308               | 636   | 890    | 1385   | Taken for research |        |
| 23                       | 207               | 756   | 1039   | 1394   | Taken for research |        |
| 24                       | 383               | 530   | 898    | 1212   | Taken for research |        |
| Avarol-treated mice      |                   |       |        |        |                    |        |
| 25                       | 174               | 469   | 605    | 995    | 1152               | 1457   |
| 26                       | 144               | 266   | 412    | 803    | 995                | 1523   |
| 27                       | 243               | 264   | 567    | 995    | 1394               | 1593   |
| 28                       | 383               | 567   | 721    | 851    | 1152               | 1810   |
| 29                       | 243               | 383   | 412    | 636    | 851                | 1267   |
| 30                       | 266               | 469   | 594    | 981    | 1316               | 1734   |
| 31                       | 266               | 412   | 709    | 1140   | 1394               | 2035   |

|    |     |     |     |       |                    |       |
|----|-----|-----|-----|-------|--------------------|-------|
| 32 | 189 | 334 | 354 | death |                    |       |
| 33 | 383 | 567 | 851 | 1047  | 1331               | 1810  |
| 34 | 402 | 567 | 605 | 851   | death              |       |
| 35 | 189 | 334 | 536 | 898   | 1047               | 1523  |
| 36 | 308 | 492 | 530 | 1077  | 1508               | 1882  |
| 37 | 308 | 636 | 709 | 1155  | 1454               | 2124  |
| 38 | 334 | 469 | 530 | 995   | 1385               | death |
| 39 | 266 | 536 | 721 | 1097  | 1385               | 2124  |
| 40 | 383 | 503 | 636 | death |                    |       |
| 41 | 353 | 662 | 756 | 1267  | 1523               | 2386  |
| 42 | 131 | 266 | 570 | 719   | 945                | 1523  |
| 43 | 324 | 436 | 503 | 851   | 1212               | 1270  |
| 44 | 226 | 567 | 567 | 995   | Taken for research |       |
| 45 | 190 | 383 | 567 | 943   | Taken for research |       |
| 46 | 144 | 206 | 442 | 803   | Taken for research |       |
| 47 | 402 | 436 | 721 | 806   | Taken for research |       |
| 48 | 353 | 412 | 567 | 943   | Taken for research |       |

**Table S6.** Individual indicators of the CC relative growth at different times after transplantation in mice of experimental groups

| Mouse No.                | Relative tumor volume, rel. units * |       |        |        |                    |        |
|--------------------------|-------------------------------------|-------|--------|--------|--------------------|--------|
|                          | 7 day                               | 9 day | 11 day | 14 day | 16 day             | 18 day |
| Control (untreated) mice |                                     |       |        |        |                    |        |
| 1                        | 1.00                                | 2.07  | 3.06   | 4.12   | 4.72               | 7.18   |
| 2                        | 1.00                                | 1.56  | 2.04   | 2.91   | 3.50               | 4.67   |
| 3                        | 1.00                                | 2.82  | 5.51   | 6.38   | 9.92               | 11.11  |
| 4                        | 1.00                                | 2.98  | 3.18   | 4.97   | 6.68               | 10.76  |
| 5                        | 1.00                                | 2.42  | 3.39   | 5.67   | 8.02               | 10.93  |
| 6                        | 1.00                                | 2.72  | 3.37   | death  |                    |        |
| 7                        | 1.00                                | 2.45  | 3.59   | 4.91   | 6.26               | 7.55   |
| 8                        | 1.00                                | 3.00  | 3.37   | 6.43   | 7.67               | 9.00   |
| 9                        | 1.00                                | 2.03  | 3.90   | 6.91   | 8.35               | 12.70  |
| 10                       | 1.00                                | 3.75  | 5.07   | 6.28   | 7.65               | death  |
| 11                       | 1.00                                | 2.22  | 3.00   | 5.36   | 6.73               | 8.32   |
| 12                       | 1.00                                | 2.61  | 3.76   | 4.26   | 5.82               | 7.71   |
| 13                       | 1.00                                | 3.18  | 4.23   | 7.00   | 8.01               | 9.52   |
| 14                       | 1.00                                | 3.75  | 5.37   | 6.94   | 9.62               | 11.88  |
| 15                       | 1.00                                | 2.92  | 4.17   | 6.43   | 7.67               | 10.55  |
| 16                       | 1.00                                | 2.73  | 2.92   | 4.80   | 6.42               | 11.05  |
| 17                       | 1.00                                | 3.35  | 3.98   | death  |                    |        |
| 18                       | 1.00                                | 2.06  | 3.26   | 4.63   | 7.27               | 9.09   |
| 19                       | 1.00                                | 2.14  | 3.94   | 6.53   | 7.10               | death  |
| 20                       | 1.00                                | 3.34  | 3.70   | 5.36   | Taken for research |        |
| 21                       | 1.00                                | 2.05  | 2.56   | 3.31   | Taken for research |        |
| 22                       | 1.00                                | 2.07  | 2.89   | 4.50   | Taken for research |        |
| 23                       | 1.00                                | 3.65  | 5.01   | 6.72   | Taken for research |        |
| 24                       | 1.00                                | 1.38  | 2.34   | 3.17   | Taken for research |        |
| Avarol-treated mice      |                                     |       |        |        |                    |        |
| 25                       | 1.00                                | 2.69  | 3.47   | 5.71   | 6.61               | 8.37   |
| 26                       | 1.00                                | 1.84  | 2.86   | 5.58   | 6.91               | 10.58  |
| 27                       | 1.00                                | 1.08  | 2.33   | 4.09   | 5.73               | 6.55   |
| 28                       | 1.00                                | 1.48  | 1.88   | 2.22   | 3.01               | 4.73   |
| 29                       | 1.00                                | 1.57  | 1.69   | 2.61   | 3.50               | 5.21   |
| 30                       | 1.00                                | 1.77  | 2.24   | 3.70   | 4.96               | 6.53   |
| 31                       | 1.00                                | 1.55  | 2.67   | 4.30   | 5.25               | 7.67   |
| 32                       | 1.00                                | 1.77  | 1.88   | death  |                    |        |
| 33                       | 1.00                                | 1.48  | 2.22   | 2.73   | 3.47               | 4.73   |
| 34                       | 1.00                                | 1.41  | 1.51   | 2.12   | death              |        |
| 35                       | 1.00                                | 1.77  | 2.84   | 4.76   | 5.56               | 8.08   |
| 36                       | 1.00                                | 1.60  | 1.72   | 3.50   | 4.90               | 6.11   |
| 37                       | 1.00                                | 2.07  | 2.30   | 3.75   | 4.72               | 6.90   |
| 38                       | 1.00                                | 1.41  | 1.59   | 2.98   | 4.15               | death  |
| 39                       | 1.00                                | 2.02  | 2.72   | 4.13   | 5.22               | 8.00   |
| 40                       | 1.00                                | 1.31  | 1.66   | death  |                    |        |

|    |      |      |      |      |                    |       |
|----|------|------|------|------|--------------------|-------|
| 41 | 1.00 | 1.87 | 2.14 | 3.59 | 4.31               | 6.75  |
| 42 | 1.00 | 2.03 | 4.35 | 5.49 | 7.22               | 11.64 |
| 43 | 1.00 | 1.34 | 1.55 | 2.63 | 3.74               | 3.92  |
| 44 | 1.00 | 2.51 | 2.51 | 4.40 | Taken for research |       |
| 45 | 1.00 | 2.01 | 2.98 | 4.96 | Taken for research |       |
| 46 | 1.00 | 1.43 | 3.07 | 5.58 | Taken for research |       |
| 47 | 1.00 | 1.08 | 1.79 | 2.00 | Taken for research |       |
| 48 | 1.00 | 1.17 | 1.61 | 2.67 | Taken for research |       |

\* - indicators for each animal (Table 5) are normalized to the initial (on the 7th day) tumor volume before the start of pharmacological interventions;

**Table S7.** Indicators of CC growth inhibition in avarol-treated mice at different observation periods

| Mouse No.           | Tumor inhibition, % |       |        |        |                    |        |
|---------------------|---------------------|-------|--------|--------|--------------------|--------|
|                     | 7 day               | 9 day | 11 day | 14 day | 16 day             | 18 day |
| Avarol-treated mice |                     |       |        |        |                    |        |
| 25                  | 0.0                 | 0.0   | 4.8    | 0.0    | 7.4                | 11.6   |
| 26                  | 0.0                 | 30.1  | 21.6   | 0.0    | 3.3                | 0.0    |
| 27                  | 0.0                 | 58.9  | 36.1   | 23.5   | 19.8               | 30.9   |
| 28                  | 0.0                 | 43.8  | 48.4   | 58.4   | 57.9               | 50.1   |
| 29                  | 0.0                 | 40.3  | 53.6   | 51.1   | 51.0               | 45.0   |
| 30                  | 0.0                 | 33.0  | 38.7   | 30.8   | 30.6               | 31.0   |
| 31                  | 0.0                 | 41.1  | 28.9   | 19.6   | 26.5               | 19.0   |
| 32                  | 0.0                 | 32.9  | 48.6   | death  |                    |        |
| 33                  | 0.0                 | 43.8  | 39.2   | 48.8   | 51.3               | 50.1   |
| 34                  | 0.0                 | 46.5  | 58.8   | 60.4   | death              |        |
| 35                  | 0.0                 | 32.9  | 22.1   | 10.9   | 22.2               | 14.6   |
| 36                  | 0.0                 | 39.4  | 52.9   | 34.5   | 31.4               | 35.4   |
| 37                  | 0.0                 | 21.6  | 36.9   | 29.8   | 33.9               | 27.1   |
| 38                  | 0.0                 | 46.6  | 56.5   | 44.2   | 41.9               | death  |
| 39                  | 0.0                 | 23.4  | 25.6   | 22.7   | 27.0               | 15.5   |
| 40                  | 0.0                 | 50.2  | 54.5   | death  |                    |        |
| 41                  | 0.0                 | 29.0  | 41.4   | 32.9   | 39.6               | 28.7   |
| 42                  | 0.0                 | 23.2  | 0.0    | 0.0    | 0.0                | 0.0    |
| 43                  | 0.0                 | 49.0  | 57.5   | 50.9   | 47.6               | 58.6   |
| 44                  | 0.0                 | 4.8   | 31.3   | 17.7   | Taken for research |        |
| 45                  | 0.0                 | 23.6  | 18.2   | 7.2    | Taken for research |        |
| 46                  | 0.0                 | 45.8  | 16.0   | 0.0    | Taken for research |        |
| 47                  | 0.0                 | 58.9  | 50.9   | 62.5   | Taken for research |        |
| 48                  | 0.0                 | 55.7  | 56.0   | 50.1   | Taken for research |        |



**Table S8.** Effect of avarol on CC growth in mice

| Time after inoculation, day | Relative tumor volume, rel. units; (M $\pm$ SD) |                           | Difference level * | Tumor inhibition, %; (M $\pm$ SD) |
|-----------------------------|-------------------------------------------------|---------------------------|--------------------|-----------------------------------|
|                             | Untreated mice                                  | Avarol-treated mice       |                    |                                   |
| 7                           | 1.00<br>n = 24                                  | 1.00<br>n = 24            | $p = 1.000000$     | 0.0                               |
| 9                           | 2.64 $\pm$ 0.66<br>n = 24                       | 1.68 $\pm$ 0.41<br>n = 24 | $p = 0.000002$     | 36.4 $\pm$ 15.3                   |
| 11                          | 3.65 $\pm$ 0.91<br>n = 24                       | 2.32 $\pm$ 0.71<br>n = 24 | $p = 0.000003$     | 37.4 $\pm$ 17.3                   |
| 14                          | 5.34 $\pm$ 1.29<br>n = 22                       | 3.79 $\pm$ 1.20<br>n = 22 | $p = 0.000559$     | 29.8 $\pm$ 21.3                   |
| 16                          | 7.14 $\pm$ 1.59<br>n = 17                       | 4.95 $\pm$ 1.25<br>n = 16 | $p = 0.000337$     | 30.7 $\pm$ 17.4                   |
| 18                          | 9.47 $\pm$ 2.12<br>n = 15                       | 7.05 $\pm$ 2.11<br>n = 15 | $p = 0.005805$     | 27.8 $\pm$ 18.0                   |

\* - calculated using the Mann-Whitney U test;

## Supplementary material S3

### Protocol for studying the effects of avarol on body weight in mice with solid Ehrlich carcinoma (SEC)

**Biological object:** female mice F1 (CBA×C57BL/6j) at the age of 2-2.5 months, with a body weight of 19-23 g.

**Method of neoplasia transplantation:** s.c. injection of  $2.5 \times 10^6$  SEC cells in 0.3 mL of medium 199 in the area of the lateral surface of the right thigh

**Animal groups and exposure scheme:** control group (n = 17) – after SEC inoculation, does not receive any effects; experimental group (n = 16) – from the 7th to the 20th day after SEC transplantation, Avarol is administered daily (50 mg/kg, i.p.) as a 0.5% suspension in water for injection.

**Table S9.** Individual indicators of body weight of mice of experimental groups at different periods after SEC transplantation

| Mouse No.                | Mouse body weight, g |        |        |        |        |        |
|--------------------------|----------------------|--------|--------|--------|--------|--------|
|                          | 7 day                | 10 day | 13 day | 15 day | 18 day | 20 day |
| Control (untreated) mice |                      |        |        |        |        |        |
| 1                        | 21                   | 22     | 23     | 24     | 24     | 25     |
| 2                        | 18                   | 19     | 20     | 21     | 22     | 23     |
| 3                        | 21                   | 21     | 21     | 22     | 23     | 24     |
| 4                        | 20                   | 21     | 21     | 22     | 23     | 24     |
| 5                        | 18                   | 19     | 20     | 21     | 22     | 23     |
| 6                        | 19                   | 19     | 20     | 20     | 21     | 22     |
| 7                        | 20                   | 20     | 20     | 21     | 22     | 23     |
| 8                        | 21                   | 21     | 21     | 21     | 23     | 22     |
| 9                        | 21                   | 20     | 21     | 22     | 23     | 24     |
| 10                       | 20                   | 20     | 21     | 22     | 23     | 24     |
| 11                       | 20                   | 19     | 20     | 21     | 22     | 23     |
| 12                       | 21                   | 21     | 22     | 22     | 23     | 24     |
| 13                       | 21                   | 21     | 21     | 22     | 23     | 24     |
| 14                       | 20                   | 20     | 21     | 21     | 22     | 23     |
| 15                       | 22                   | 22     | 23     | 22     | 23     | 25     |
| 16                       | 20                   | 21     | 21     | 22     | 22     | 23     |
| 17                       | 20                   | 20     | 21     | 20     | 21     | 22     |
| Avarol-treated mice      |                      |        |        |        |        |        |
| 18                       | 20                   | 19     | 20     | 21     | 22     | 23     |
| 19                       | 21                   | 22     | 23     | 24     | 25     | 25     |
| 20                       | 21                   | 20     | 21     | 22     | 22     | 23     |
| 21                       | 21                   | 20     | 20     | 21     | 22     | 23     |
| 22                       | 19                   | 18     | 19     | 20     | 22     | 23     |
| 23                       | 20                   | 19     | 19     | 20     | 21     | 22     |
| 24                       | 20                   | 19     | 20     | 21     | 22     | 23     |
| 25                       | 22                   | 21     | 21     | 22     | 23     | 24     |
| 26                       | 20                   | 19     | 20     | 21     | 21     | 22     |
| 27                       | 20                   | 19     | 19     | 20     | 21     | 22     |
| 28                       | 18                   | 18     | 18     | 19     | 20     | 21     |

|    |    |    |    |    |    |    |
|----|----|----|----|----|----|----|
| 29 | 20 | 19 | 19 | 20 | 21 | 22 |
| 30 | 20 | 19 | 19 | 20 | 22 | 23 |
| 31 | 20 | 19 | 19 | 20 | 21 | 22 |
| 32 | 19 | 19 | 20 | 20 | 21 | 22 |
| 33 | 20 | 20 | 21 | 21 | 22 | 23 |

**Table S10.** Individual indicators of the relative body weight of mice of the experimental groups at different periods after SEC transplantation

| Mouse No.                | Mouse relative body weight, % * |        |        |        |        |        |
|--------------------------|---------------------------------|--------|--------|--------|--------|--------|
|                          | 7 day                           | 10 day | 13 day | 15 day | 18 day | 20 day |
| Control (untreated) mice |                                 |        |        |        |        |        |
| 1                        | 100.0                           | 104.8  | 109.5  | 114.3  | 114.3  | 119.0  |
| 2                        | 100.0                           | 105.6  | 111.1  | 116.7  | 122.2  | 127.8  |
| 3                        | 100.0                           | 100.0  | 100.0  | 104.8  | 109.5  | 114.3  |
| 4                        | 100.0                           | 105.0  | 105.0  | 110.0  | 115.0  | 120.0  |
| 5                        | 100.0                           | 105.6  | 111.1  | 116.7  | 122.2  | 127.8  |
| 6                        | 100.0                           | 100.0  | 105.3  | 105.3  | 110.5  | 115.8  |
| 7                        | 100.0                           | 100.0  | 100.0  | 105.0  | 110.0  | 115.0  |
| 8                        | 100.0                           | 100.0  | 100.0  | 100.0  | 109.5  | 104.8  |
| 9                        | 100.0                           | 95.3   | 100.0  | 104.8  | 109.5  | 114.3  |
| 10                       | 100.0                           | 100.0  | 105.0  | 110.0  | 115.0  | 120.0  |
| 11                       | 100.0                           | 95.0   | 100.0  | 105.0  | 110.0  | 115.0  |
| 12                       | 100.0                           | 100.0  | 104.8  | 104.8  | 109.5  | 114.3  |
| 13                       | 100.0                           | 100.0  | 100.0  | 104.8  | 109.5  | 114.3  |
| 14                       | 100.0                           | 100.0  | 105.0  | 105.0  | 110.0  | 115.0  |
| 15                       | 100.0                           | 100.0  | 104.5  | 100.0  | 104.5  | 113.6  |
| 16                       | 100.0                           | 105.0  | 105.0  | 110.0  | 110.0  | 115.0  |
| 17                       | 100.0                           | 100.0  | 105.0  | 100.0  | 105.0  | 110.0  |
| Avarol-treated mice      |                                 |        |        |        |        |        |
| 18                       | 100.0                           | 95.0   | 100.0  | 105.0  | 110.0  | 115.0  |
| 19                       | 100.0                           | 104.8  | 109.5  | 114.3  | 119.0  | 119.0  |
| 20                       | 100.0                           | 95.2   | 100.0  | 104.8  | 104.8  | 109.5  |
| 21                       | 100.0                           | 95.2   | 95.2   | 100.0  | 104.8  | 109.5  |
| 22                       | 100.0                           | 94.7   | 100.0  | 105.3  | 115.8  | 121.1  |
| 23                       | 100.0                           | 95.0   | 95.0   | 100.0  | 105.0  | 110.0  |
| 24                       | 100.0                           | 95.0   | 100.0  | 105.0  | 110.0  | 115.0  |
| 25                       | 100.0                           | 95.5   | 95.5   | 100.0  | 104.5  | 109.1  |
| 26                       | 100.0                           | 95.0   | 100.0  | 105.0  | 105.0  | 110.0  |
| 27                       | 100.0                           | 95.0   | 95.0   | 100.0  | 105.0  | 110.0  |
| 28                       | 100.0                           | 100.0  | 100.0  | 105.5  | 111.1  | 116.7  |
| 29                       | 100.0                           | 95.0   | 95.0   | 100.0  | 105.0  | 110.0  |
| 30                       | 100.0                           | 95.0   | 95.0   | 100.0  | 110.0  | 115.0  |
| 31                       | 100.0                           | 95.0   | 95.0   | 100.0  | 105.0  | 110.0  |
| 32                       | 100.0                           | 100.0  | 105.3  | 105.3  | 110.5  | 115.8  |
| 33                       | 100.0                           | 100.0  | 105.0  | 105.0  | 110.0  | 115.0  |

\* - indicators for each animal (Table 1) are normalized to the initial (on the 7th day) tumor volume before the start of pharmacological interventions;

**Table S11.** The effect of Avarol on the dynamics of body weight in mice after SEC inoculation

| Time after inoculation,<br>day | Mouse relative body weight, %; (M $\pm$ SD) |                                 | Difference<br>level * |
|--------------------------------|---------------------------------------------|---------------------------------|-----------------------|
|                                | Untreated mice<br>(n = 17)                  | Avarol-treated mice (n<br>= 16) |                       |
| 7                              | 100.0                                       | 100.0                           | $p = 1.000000$        |
| 10                             | 100.9 $\pm$ 3.2                             | 96.6 $\pm$ 2.9                  | $p = 0.000471$        |
| 13                             | 104.2 $\pm$ 3.8                             | 99.1 $\pm$ 4.5                  | $p = 0.003376$        |
| 15                             | 106.9 $\pm$ 5.3                             | 103.4 $\pm$ 3.9                 | $p = 0.146036$        |
| 18                             | 111.6 $\pm$ 4.9                             | 108.5 $\pm$ 4.4                 | $p = 0.189292$        |
| 20                             | 116.2 $\pm$ 5.6                             | 113.2 $\pm$ 3.9                 | $p = 0.166231$        |

\* - calculated using the Mann-Whitney U test;

# **Protocol for studying the effect of avarol on body weight in mice with cervical cancer (CC-5)**

**Biological object:** female mice CBA at the age of 2 months, with a body weight of 19-22 g.

**Method of neoplasia transplantation:** s.c. injection of a homogenate of 100 mg of tumor tissue in 0.5 mL of medium 199 into the region of the lateral surface of the right thigh

**Groups of animals and treatment scheme:** control group (n = 24) – after CC transplantation, does not receive any effects; the experimental group (n = 24) - from the 7th to the 18th day after CC inoculation, mice are injected daily with avarol (50 mg/kg, i.p.) in the form of a 0.5% suspension in water for injections. On the 14th day, 5 mice are removed from each group for staged morphological studies.

**Table S12.** Individual indicators of body weight of mice of experimental groups at different periods after CC transplantation

| Mouse No.                | Mouse body weight, g |       |        |        |                    |        |
|--------------------------|----------------------|-------|--------|--------|--------------------|--------|
|                          | 7 day                | 9 day | 11 day | 14 day | 16 day             | 18 day |
| Control (untreated) mice |                      |       |        |        |                    |        |
| 1                        | 22                   | 22    | 22     | 23     | 23                 | 24     |
| 2                        | 21                   | 21    | 21     | 22     | 23                 | 24     |
| 3                        | 24                   | 24    | 24     | 26     | 26                 | 27     |
| 4                        | 19                   | 19    | 19     | 20     | 21                 | 24     |
| 5                        | 23                   | 22    | 23     | 24     | 24                 | 24     |
| 6                        | 27                   | 26    | 25     | death  |                    |        |
| 7                        | 26                   | 26    | 27     | 28     | 28                 | 28     |
| 8                        | 26                   | 26    | 25     | 26     | 28                 | 28     |
| 9                        | 23                   | 22    | 23     | 24     | 25                 | 26     |
| 10                       | 23                   | 23    | 22     | 22     | 21                 | death  |
| 11                       | 22                   | 22    | 21     | 23     | 23                 | 25     |
| 12                       | 18                   | 17    | 17     | 18     | 19                 | 22     |
| 13                       | 19                   | 18    | 19     | 20     | 20                 | 22     |
| 14                       | 21                   | 22    | 22     | 23     | 23                 | 24     |
| 15                       | 23                   | 23    | 23     | 24     | 25                 | 26     |
| 16                       | 19                   | 19    | 19     | 20     | 21                 | 23     |
| 17                       | 23                   | 23    | 21     | death  |                    |        |
| 18                       | 16                   | 18    | 18     | 19     | 19                 | 20     |
| 19                       | 23                   | 23    | 24     | 25     | 24                 | death  |
| 20                       | 23                   | 24    | 23     | 24     | Taken for research |        |
| 21                       | 21                   | 21    | 21     | 22     | Taken for research |        |
| 22                       | 21                   | 20    | 20     | 21     | Taken for research |        |
| 23                       | 21                   | 22    | 21     | 22     | Taken for research |        |
| 24                       | 24                   | 22    | 23     | 25     | Taken for research |        |
| Avarol-treated mice      |                      |       |        |        |                    |        |
| 25                       | 23                   | 22    | 22     | 23     | 24                 | 25     |
| 26                       | 21                   | 20    | 21     | 22     | 23                 | 24     |
| 27                       | 24                   | 23    | 24     | 24     | 25                 | 26     |
| 28                       | 22                   | 21    | 21     | 23     | 23                 | 24     |
| 29                       | 23                   | 22    | 22     | 23     | 24                 | 25     |
| 30                       | 24                   | 23    | 23     | 24     | 24                 | 25     |

|    |    |    |    |       |                    |       |
|----|----|----|----|-------|--------------------|-------|
| 31 | 25 | 25 | 24 | 26    | 27                 | 27    |
| 32 | 25 | 24 | 23 | death |                    |       |
| 33 | 23 | 22 | 23 | 24    | 24                 | 26    |
| 34 | 23 | 22 | 22 | 22    | death              |       |
| 35 | 21 | 20 | 20 | 22    | 23                 | 24    |
| 36 | 26 | 25 | 25 | 27    | 27                 | 28    |
| 37 | 24 | 23 | 25 | 25    | 26                 | 27    |
| 38 | 24 | 23 | 24 | 25    | 26                 | death |
| 39 | 22 | 21 | 21 | 22    | 24                 | 25    |
| 40 | 24 | 24 | 25 | death |                    |       |
| 41 | 24 | 23 | 24 | 25    | 26                 | 27    |
| 42 | 23 | 23 | 23 | 24    | 25                 | 26    |
| 43 | 22 | 21 | 22 | 23    | 24                 | 25    |
| 44 | 19 | 19 | 20 | 21    | Taken for research |       |
| 45 | 20 | 20 | 20 | 21    | Taken for research |       |
| 46 | 24 | 22 | 23 | 25    | Taken for research |       |
| 47 | 19 | 19 | 20 | 21    | Taken for research |       |
| 48 | 21 | 20 | 21 | 23    | Taken for research |       |

**Table S13.** Individual indicators of the relative body weight of mice of the experimental groups at different periods after CC transplantation

| Mouse No.                | Mouse relative body weight, % * |       |        |        |                    |        |
|--------------------------|---------------------------------|-------|--------|--------|--------------------|--------|
|                          | 7 day                           | 9 day | 11 day | 14 day | 16 day             | 18 day |
| Control (untreated) mice |                                 |       |        |        |                    |        |
| 1                        | 100.0                           | 100.0 | 100.0  | 104.5  | 104.5              | 109.1  |
| 2                        | 100.0                           | 100.0 | 100.0  | 104.8  | 109.5              | 114.3  |
| 3                        | 100.0                           | 100.0 | 100.0  | 108.3  | 108.3              | 112.5  |
| 4                        | 100.0                           | 100.0 | 100.0  | 105.3  | 110.5              | 126.3  |
| 5                        | 100.0                           | 95.7  | 100.0  | 104.3  | 104.3              | 104.3  |
| 6                        | 100.0                           | 96.3  | 92.6   | death  |                    |        |
| 7                        | 100.0                           | 100.0 | 103.8  | 107.7  | 107.7              | 107.7  |
| 8                        | 100.0                           | 100.0 | 96.2   | 100.0  | 107.7              | 107.7  |
| 9                        | 100.0                           | 95.7  | 100.0  | 104.3  | 108.7              | 113.0  |
| 10                       | 100.0                           | 100.0 | 95.7   | 95.7   | 91.3               | death  |
| 11                       | 100.0                           | 100.0 | 95.5   | 104.5  | 104.5              | 113.6  |
| 12                       | 100.0                           | 94.4  | 94.4   | 100.0  | 105.6              | 122.2  |
| 13                       | 100.0                           | 94.7  | 100.0  | 105.3  | 105.3              | 115.8  |
| 14                       | 100.0                           | 104.8 | 104.8  | 109.5  | 109.5              | 114.3  |
| 15                       | 100.0                           | 100.0 | 100.0  | 104.3  | 108.7              | 113.0  |
| 16                       | 100.0                           | 100.0 | 100.0  | 105.3  | 110.5              | 121.1  |
| 17                       | 100.0                           | 100.0 | 91.3   | death  |                    |        |
| 18                       | 100.0                           | 112.5 | 112.5  | 118.8  | 118.8              | 125.0  |
| 19                       | 100.0                           | 100.0 | 104.3  | 108.7  | 104.3              | death  |
| 20                       | 100.0                           | 104.3 | 100.0  | 104.3  | Taken for research |        |
| 21                       | 100.0                           | 100.0 | 100.0  | 104.8  | Taken for research |        |
| 22                       | 100.0                           | 95.2  | 95.2   | 100.0  | Taken for research |        |
| 23                       | 100.0                           | 104.8 | 100.0  | 104.8  | Taken for research |        |
| 24                       | 100.0                           | 91.7  | 95.8   | 104.2  | Taken for research |        |
| Avarol-treated mice      |                                 |       |        |        |                    |        |
| 25                       | 100.0                           | 95.7  | 95.7   | 100.0  | 104.4              | 108.7  |
| 26                       | 100.0                           | 95.2  | 100.0  | 104.8  | 109.5              | 114.3  |
| 27                       | 100.0                           | 95.8  | 100.0  | 100.0  | 104.2              | 108.3  |
| 28                       | 100.0                           | 95.5  | 95.5   | 104.6  | 104.6              | 109.1  |
| 29                       | 100.0                           | 95.7  | 95.7   | 100.0  | 104.4              | 108.7  |
| 30                       | 100.0                           | 95.8  | 95.8   | 100.0  | 100.0              | 104.2  |
| 31                       | 100.0                           | 100.0 | 96.0   | 104.0  | 108.0              | 108.0  |
| 32                       | 100.0                           | 96.0  | 92.0   | death  |                    |        |
| 33                       | 100.0                           | 95.7  | 100.0  | 104.4  | 104.4              | 113.0  |
| 34                       | 100.0                           | 95.7  | 95.7   | 95.7   | death              |        |
| 35                       | 100.0                           | 95.2  | 95.2   | 104.8  | 109.5              | 114.3  |
| 36                       | 100.0                           | 96.2  | 96.2   | 103.9  | 103.9              | 107.7  |
| 37                       | 100.0                           | 95.8  | 104.2  | 104.2  | 108.3              | 112.5  |
| 38                       | 100.0                           | 95.8  | 100.0  | 104.2  | 108.3              | death  |
| 39                       | 100.0                           | 95.5  | 95.5   | 100.0  | 109.1              | 113.6  |
| 40                       | 100.0                           | 100.0 | 104.2  | death  |                    |        |

|    |       |       |       |       |                    |       |
|----|-------|-------|-------|-------|--------------------|-------|
| 41 | 100.0 | 95.8  | 100.0 | 104.2 | 108.3              | 112.5 |
| 42 | 100.0 | 100.0 | 100.0 | 104.4 | 108.7              | 113.0 |
| 43 | 100.0 | 95.5  | 100.0 | 104.6 | 109.1              | 113.6 |
| 44 | 100.0 | 100.0 | 105.3 | 110.5 | Taken for research |       |
| 45 | 100.0 | 100.0 | 100.0 | 105.0 | Taken for research |       |
| 46 | 100.0 | 91.7  | 95.8  | 104.2 | Taken for research |       |
| 47 | 100.0 | 100.0 | 105.3 | 110.5 | Taken for research |       |
| 48 | 100.0 | 95.2  | 100.0 | 109.5 | Taken for research |       |

\* - indicators for each animal (Table 4) are normalized to the initial (on the 7th day) tumor volume before the start of pharmacological interventions;

**Table S14.** The effect of avarol on the dynamics of body weight in mice after CC inoculation

| Time after inoculation,<br>day | Mouse relative body weight, %; (M $\pm$ SD) |                           | Difference<br>level * |
|--------------------------------|---------------------------------------------|---------------------------|-----------------------|
|                                | Untreated mice                              | Avarol-treated mice       |                       |
| 7                              | 100.0<br>n = 24                             | 100.0<br>n = 24           | $p = 1.000000$        |
| 9                              | 99.6 $\pm$ 4.3<br>n = 24                    | 96.6 $\pm$ 2.2<br>n = 24  | $p = 0.009253$        |
| 11                             | 99.3 $\pm$ 4.4<br>n = 24                    | 98.7 $\pm$ 3.6<br>n = 24  | $p = 0.722115$        |
| 14                             | 105.0 $\pm$ 4.4<br>n = 22                   | 103.8 $\pm$ 3.6<br>n = 22 | $p = 0.110865$        |
| 16                             | 107.1 $\pm$ 5.4<br>n = 17                   | 106.5 $\pm$ 2.8<br>n = 16 | $p = 0.375445$        |
| 18                             | 114.7 $\pm$ 6.5<br>n = 15                   | 110.8 $\pm$ 3.1<br>n = 15 | $p = 0.087810$        |

\* - calculated using the Mann-Whitney U test;
